# Supplementary material for: Pore structure improvement of carbon aerogel and investigation of the supercapacitive behavior of a Co3O4nanoball/carbon aerogel composite
Source: Royal Society of Chemistry journal article supplement (doi:10.1039/c7nj02897k), 2017-01-01
Supplement: c7nj02897k1.pdf [file c7nj02897k1.pdf]

## Supporting Information

### **Pore Structure Improvement of Carbon Aerogel and Investigation of Supercapacitive Behavior of Co<sub>3</sub>O<sub>4</sub> Nanoball /Carbon Aerogel Composite**

Majid zomorodian esfahani<sup>a</sup>, Alireza Aghaei<sup>\*a</sup>, Mohsen Khosravi<sup>b</sup>, Narjes Bagheri<sup>c</sup>, Zahra Khakpour<sup>a</sup>  
and Masoumeh javaheri<sup>a</sup>

<sup>a</sup>*Ceramic Division, Materials and Energy Research Center, P.O. Box 31787-316, Karaj, Iran.*

<sup>b</sup>*Department of Nanotechnology Engineering, Faculty of Advanced Science and Technologies, University of Isfahan, Isfahan, 81744-73441, Iran.*

<sup>c</sup>*Non-metallic Research Group & Center of Nanotechnology Development, Niroo Research Institute (NRI).*

\*E-mail addresses: a-aghaei@merc.ac.ir (A. Aghaei)

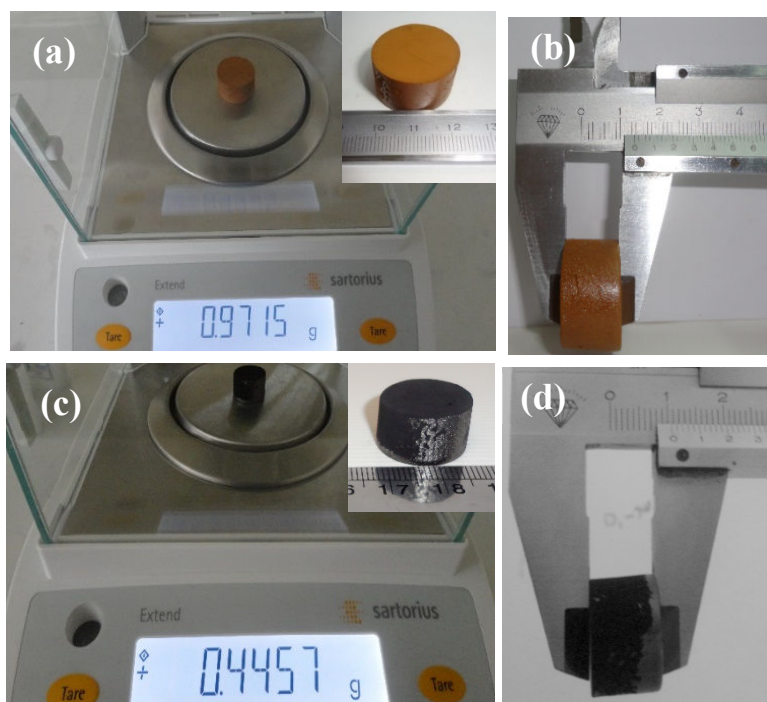

**Fig. S1:** digital images of OA1, before (a, b) and after carbonization (c, d), the weight measurement process shows the carbon aerogel weight after carbonization of 0.44 g with volume of 2.851 cm<sup>3</sup> ( $\rho=0.15$  g cm<sup>-3</sup>).

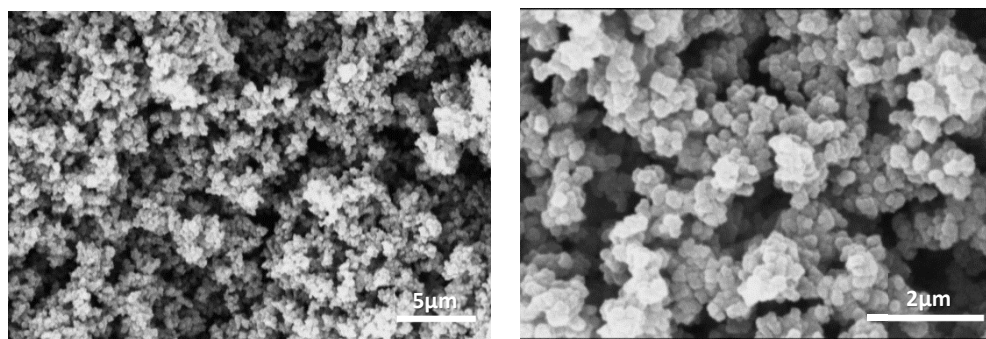

**Fig. S2:** FE-SEM images of CA2 sample.

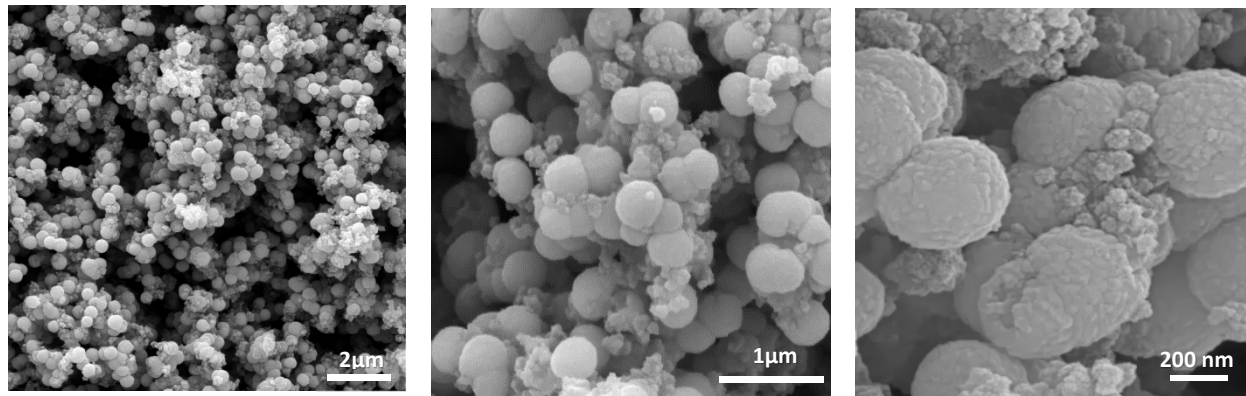

**Fig. S3:** Additional FE-SEM images of Co<sub>3</sub>O<sub>4</sub> nanoballs anchored CA1.

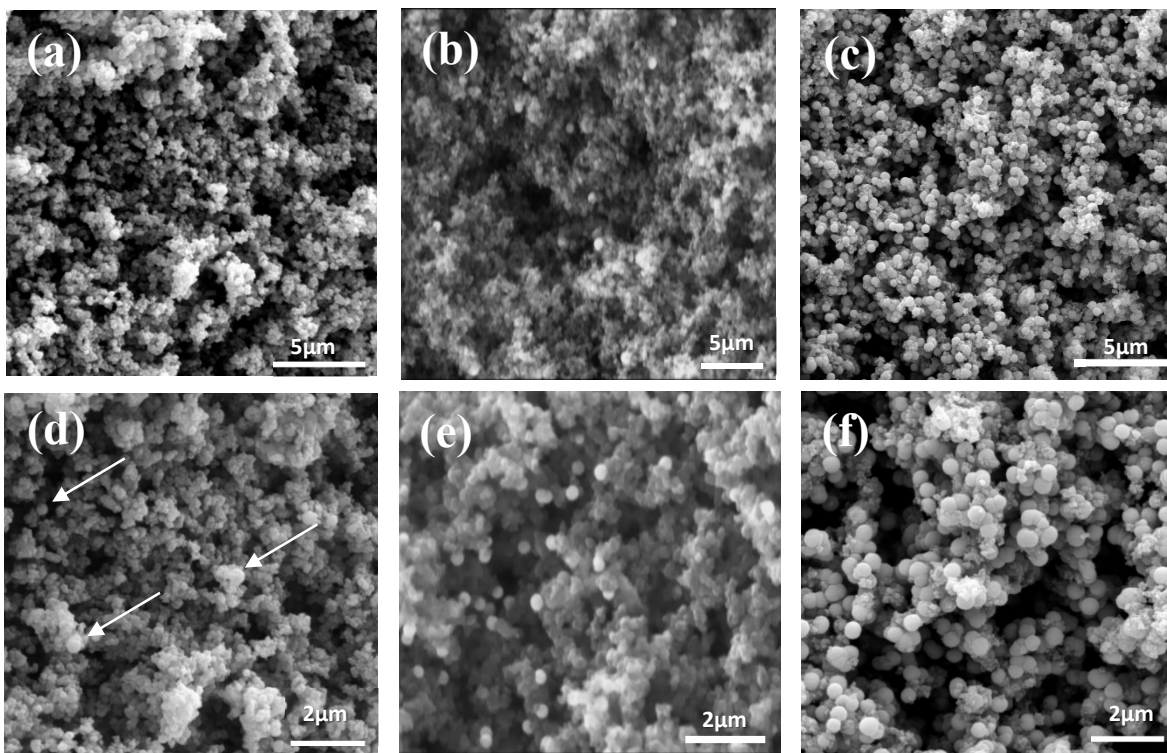

**Fig. S4:** FE-SEM images of Co<sub>3</sub>O<sub>4</sub> nanoballs anchored CA2 (a, d-b, e) and CA1 (c, f), for comparison. Arrows shows Co<sub>3</sub>O<sub>4</sub> nanoball.

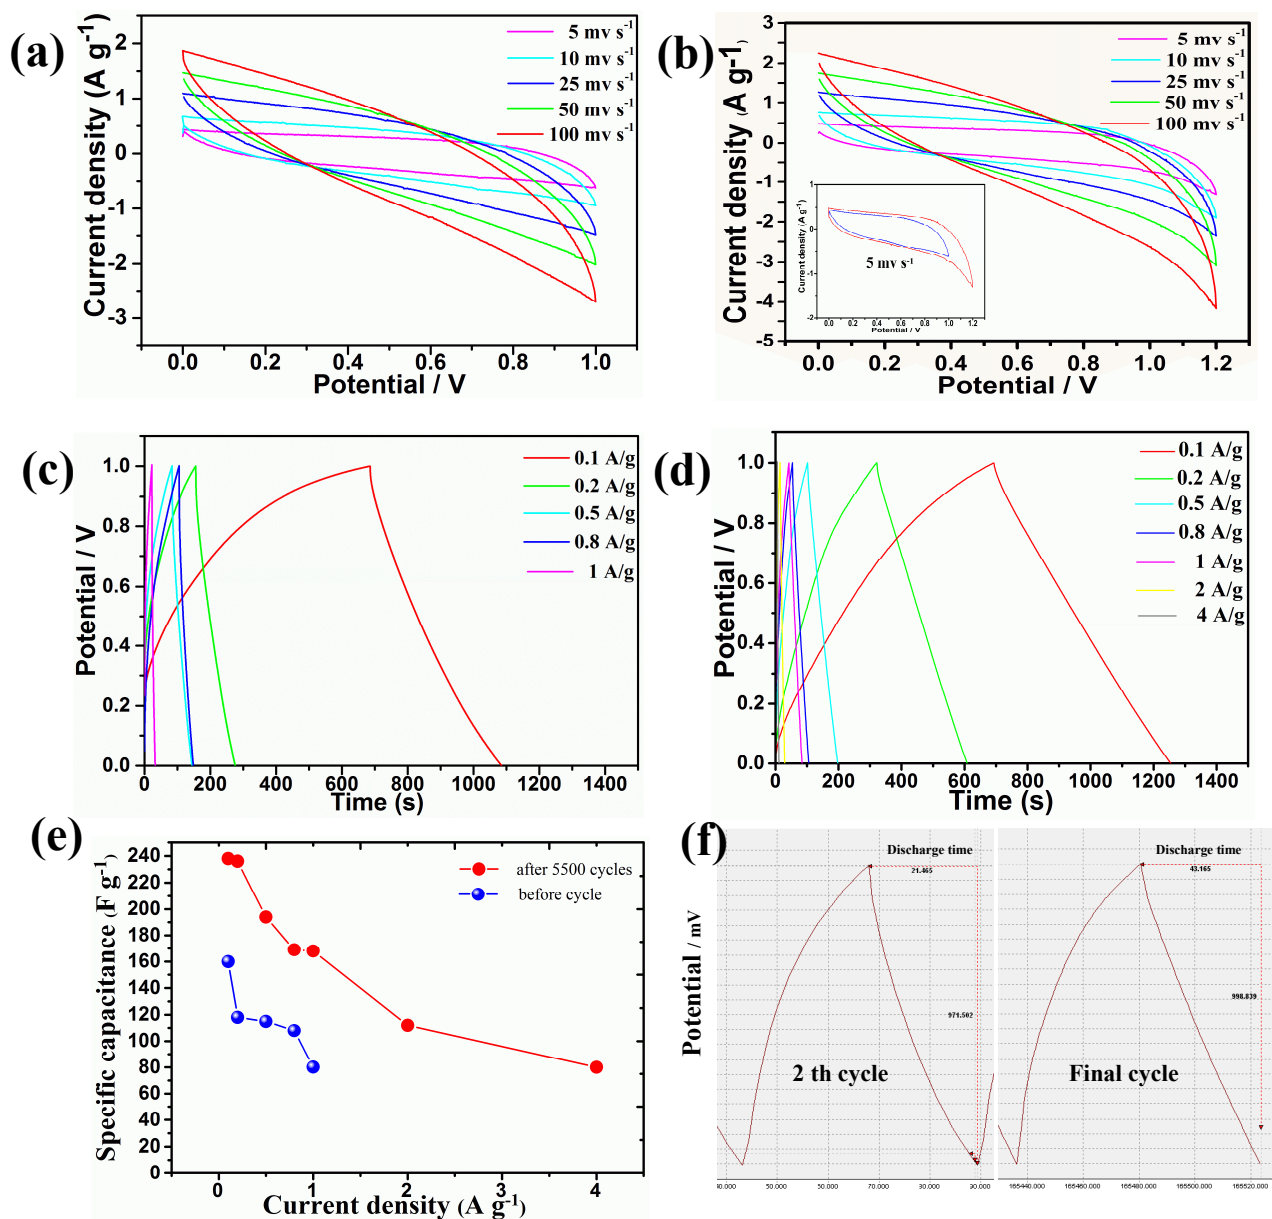

**Fig. S5:** Cyclic voltammograms of symmetric two-electrode supercapacitor at different scan rates (a, b) and collected at different voltage windows (b, inset). Galvanostatic charge/discharge curves of CAC2 at various current densities before cycling test (c). Galvanostatic charge/discharge curves of CAC2 at various current densities after 5500 cycles (d). The specific capacitance of CAC2 as a function of current density (e). Galvanostatic charge/discharge curves of CAC2 at a current density of  $1 \text{ A g}^{-1}$  in 2 th cycle and final cycle (6000 th cycle), indicates increase in the discharge time of final cycle (these graphs are retrieved from the software of *Analyzer* version 7.0.9) (f).

**Table S1:** Comparison of Pore structure properties of carbon aerogels.

| <b>Sample</b> | $S_{BET} (\frac{m^2}{gr})$ | $V_{total} (\frac{cm^3}{gr})$ | $V_{mic} (\frac{cm^3}{gr})$ | $V_{meso} (\frac{cm^3}{gr})$ | Drying method             | ref       |
|---------------|----------------------------|-------------------------------|-----------------------------|------------------------------|---------------------------|-----------|
| CA1           | <b>907</b>                 | <b>6.26</b>                   | <b>0.35</b>                 | <b>4.86</b>                  | Infrared dryer setup      | This work |
| CA2           | <b>477</b>                 | <b>0.44</b>                   | <b>0.13</b>                 | <b>0.14</b>                  | Microwave drying          | This work |
| CA-K-A1000    | <b>2796</b>                | <b>1.89</b>                   | <b>1.33</b>                 | NC                           | Ambient pressure drying   |           |
| CA-A1000      | <b>2139</b>                | <b>1.00</b>                   | <b>0.81</b>                 | NC                           | Ambient pressure drying   | [1]       |
| CA-K-A900     | <b>1403</b>                | <b>0.64</b>                   | <b>0.58</b>                 | NC                           | Ambient pressure drying   |           |
| CA900         | <b>1005</b>                | <b>1.2</b>                    | <b>0.54</b>                 | <b>0.66</b>                  | Ambient pressure drying   |           |
| CA900-A       | <b>1539</b>                | <b>1.7</b>                    | <b>0.71</b>                 | <b>0.99</b>                  | Ambient pressure drying   | [2]       |
| CA-A3         | <b>752</b>                 | NC                            | <b>0.15</b>                 | <b>1.33</b>                  | Hot supercritical drying  | [3]       |
| CA#1          | <b>669</b>                 | <b>5.6</b>                    | <b>0.33</b>                 | <b>1.9</b>                   | Cold supercritical drying | [4]       |
| CA-SC-A1000   | <b>2617</b>                | <b>1.7</b>                    | <b>0.92</b>                 | NC                           | Cold supercritical drying | [5]       |

Where  $S_{BET}$ ,  $V_{mic}$ ,  $V_{mes}$ ,  $V_{total}$  are BET surface area, volume of micro and mesopores and total pore volume respectively.

K-A refers to chemical and thermal activation, respectively.

NC refers to “the data are not calculated

**Table S2.** Synthetic methods and capacitances of the previously reported Co<sub>3</sub>O<sub>4</sub> / carbon-based supercapacitors and Co<sub>3</sub>O<sub>4</sub> nanoball/CA composites in our work.

| <b>Material</b>                                   | <b>Synthetic method</b>          | <b>Current Density</b>      | <b>Potential window (ΔV)</b> | <b>Capacitance (F g<sup>-1</sup>)</b> | <b>Reference</b> |
|---------------------------------------------------|----------------------------------|-----------------------------|------------------------------|---------------------------------------|------------------|
| CNT@1600-Co <sub>3</sub> O <sub>4</sub> /CC       | ALD<br>(atomic layer deposition) | 1-10 (mA cm <sup>-2</sup> ) | 0.7                          | 350-225                               | [6]              |
| Co <sub>3</sub> O <sub>4</sub> /C-800 °C          | precipitation                    | 1-20 (A g <sup>-1</sup> )   | 0.5                          | ~200-195                              | [7]              |
| PSAC/Co <sub>3</sub> O <sub>4</sub> Nps           | Hydrothermal method              | 1-10 (A g <sup>-1</sup> )   | 0.45                         | ~ 100-50                              | [8]              |
| NCA/ Co <sub>3</sub> O <sub>4</sub> Nps           | precipitation                    | 1-10 (A g <sup>-1</sup> )   | 0.4                          | ~ 600-450                             | [9]              |
| RGOA/ Co <sub>3</sub> O <sub>4</sub> Nps          | Solvothermal process             | 0.5-10 (A g <sup>-1</sup> ) | 0.5                          | ~ 650-500                             | [10]             |
| Mesoporous Co <sub>3</sub> O <sub>4</sub> /Carbon | Solvothermal process             | 0.5-5 (A g <sup>-1</sup> )  | 0.6                          | ~ 400-175                             | [11]             |
| needle-like Co <sub>3</sub> O <sub>4</sub> /GNS   | Hydrothermal method              | 0.1-1 (A g <sup>-1</sup> )  | 0.6                          | ~160-63                               | [12]             |
| Nanoball Co <sub>3</sub> O <sub>4</sub> /CA       | Hydrothermal method              | 0.8-10 (A g <sup>-1</sup> ) | 0.7                          | ~350-185.7                            | This work        |

**Table S3:** Electrochemical characteristics of the Co<sub>3</sub>O<sub>4</sub> nanoball /carbon aerogel symmetric two-electrode supercapacitor after cycling performance.

| <b>Current density (A g<sup>-1</sup>)</b> | <b>Specific Capacitance (F g<sup>-1</sup>)</b> | <b>Energy Density (W h Kg<sup>-1</sup>)</b> | <b>Power Density (W Kg<sup>-1</sup>)</b> | <b>Coulombic efficiency-η (%)</b> |
|-------------------------------------------|------------------------------------------------|---------------------------------------------|------------------------------------------|-----------------------------------|
| <b>0.1</b>                                | <b>232.4</b>                                   | <b>32.22</b>                                | <b>55.55</b>                             | <b>83.69</b>                      |
| <b>0.2</b>                                | <b>236.05</b>                                  | <b>32.77</b>                                | <b>111.1</b>                             | <b>91.90</b>                      |
| <b>0.5</b>                                | <b>194.3</b>                                   | <b>26.94</b>                                | <b>277.7</b>                             | <b>96.03</b>                      |
| <b>0.8</b>                                | <b>169.1</b>                                   | <b>23.47</b>                                | <b>442.8</b>                             | <b>98.14</b>                      |
| <b>1</b>                                  | <b>168.2</b>                                   | <b>23.33</b>                                | <b>555.5</b>                             | <b>97.6</b>                       |
| <b>2</b>                                  | <b>112.7</b>                                   | <b>15.5</b>                                 | <b>1107</b>                              | <b>100</b>                        |
| <b>4</b>                                  | <b>80.2</b>                                    | <b>11.11</b>                                | <b>2222</b>                              | <b>100</b>                        |

## Reference

1. Ling, S.K., et al., *KOH catalysed preparation of activated carbon aerogels for dye adsorption*. Journal of colloid and interface science, 2011. **357**(1): p. 157-162.
2. Tian, H.-Y., et al., *Preparation, microstructure and hydrogen sorption properties of nanoporous carbon aerogels under ambient drying*. Nanotechnology, 2008. **19**(47): p. 475605.
3. Wu, D., R. Fu, and Z. Yu, *Organic and carbon aerogels from the NaOH-catalyzed polycondensation of resorcinol-furfural and supercritical drying in ethanol*. Journal of applied polymer science, 2005. **96**(4): p. 1429-1435.
4. Marie, J.F., et al., *Synthesis of highly porous catalytic layers for Polymer Electrolyte Fuel Cell based on carbon aerogels*. ECS Transactions, 2006. **1**(6): p. 509-519.
5. Tian, H.-Y., et al., *Carbon aerogels from acetic acid catalysed resorcinol-furfural using supercritical drying for hydrogen storage*. The Journal of Supercritical Fluids, 2011. **55**(3): p. 1115-1117.
6. Guan, C., et al., *Atomic layer deposition of Co<sub>3</sub>O<sub>4</sub> on carbon nanotubes/carbon cloth for high-capacitance and ultrastable supercapacitor electrode*. Nanotechnology, 2015. **26**(9): p. 094001.
7. Wang, N., et al., *Facile self-crosslinking synthesis of 3D nanoporous Co<sub>3</sub>O<sub>4</sub>/carbon hybrid electrode materials for supercapacitors*. ACS applied materials & interfaces, 2016.
8. Madhu, R., et al., *Honeycomb-like porous carbon-cobalt oxide nanocomposite for high-performance enzymeless glucose sensor and supercapacitor applications*. ACS applied materials & interfaces, 2015. **7**(29): p. 15812-15820.
9. Sun, G., et al., *Incorporation of homogeneous Co<sub>3</sub>O<sub>4</sub> into a nitrogen-doped carbon aerogel via a facile in situ synthesis method: implications for high performance asymmetric supercapacitors*. Journal of Materials Chemistry A, 2016. **4**(24): p. 9542-9554.
10. Xie, L., et al., *Self-Assembled 3D Graphene-Based Aerogel with Co<sub>3</sub>O<sub>4</sub> Nanoparticles as High-Performance Asymmetric Supercapacitor Electrode*. ChemSusChem, 2015. **8**(17): p. 2917-2926.
11. Balasubramanian, S. and P.K. Kamaraj, *Fabrication of natural polymer assisted mesoporous Co<sub>3</sub>O<sub>4</sub>/carbon composites for supercapacitors*. Electrochimica Acta, 2015. **168**: p. 50-58.
12. Guan, Q., et al., *Needle-like Co<sub>3</sub>O<sub>4</sub> anchored on the graphene with enhanced electrochemical performance for aqueous supercapacitors*. ACS applied materials & interfaces, 2014. **6**(10): p. 7626-7632.
